# Supplementary material for: Association of STAT3 and STAT4 polymorphisms with susceptibility to chronic hepatitis B virus infection and risk of hepatocellular carcinoma: a meta-analysis
Source: Oxford University Press journal article supplement (doi:10.1042/bsr20190783), 2019-06-01
Supplement: bsr-2019-0783_supp.pdf [file bsr-2019-0783_supp.pdf]

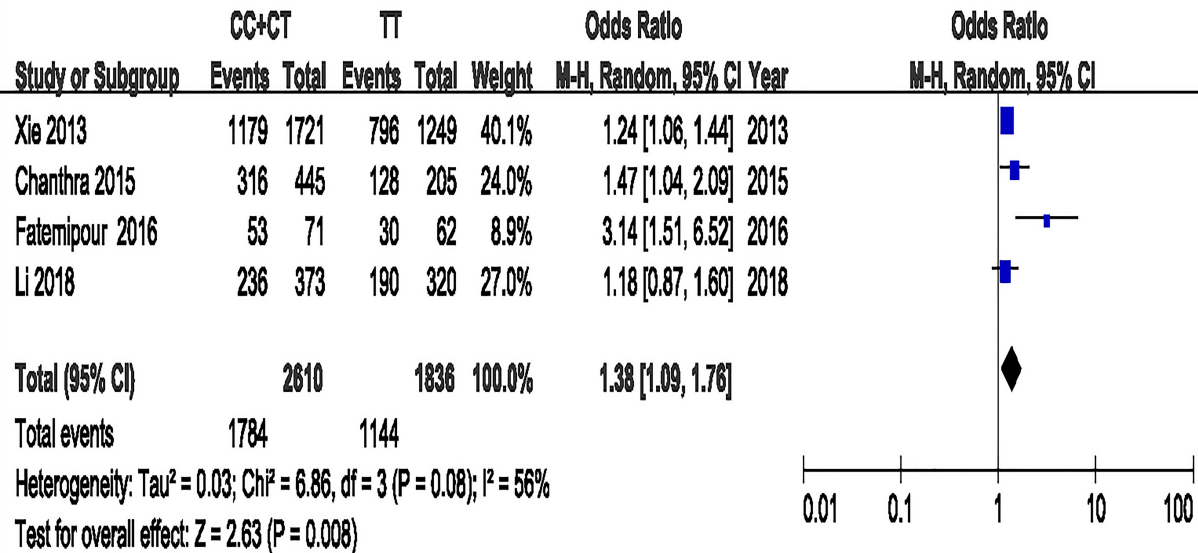

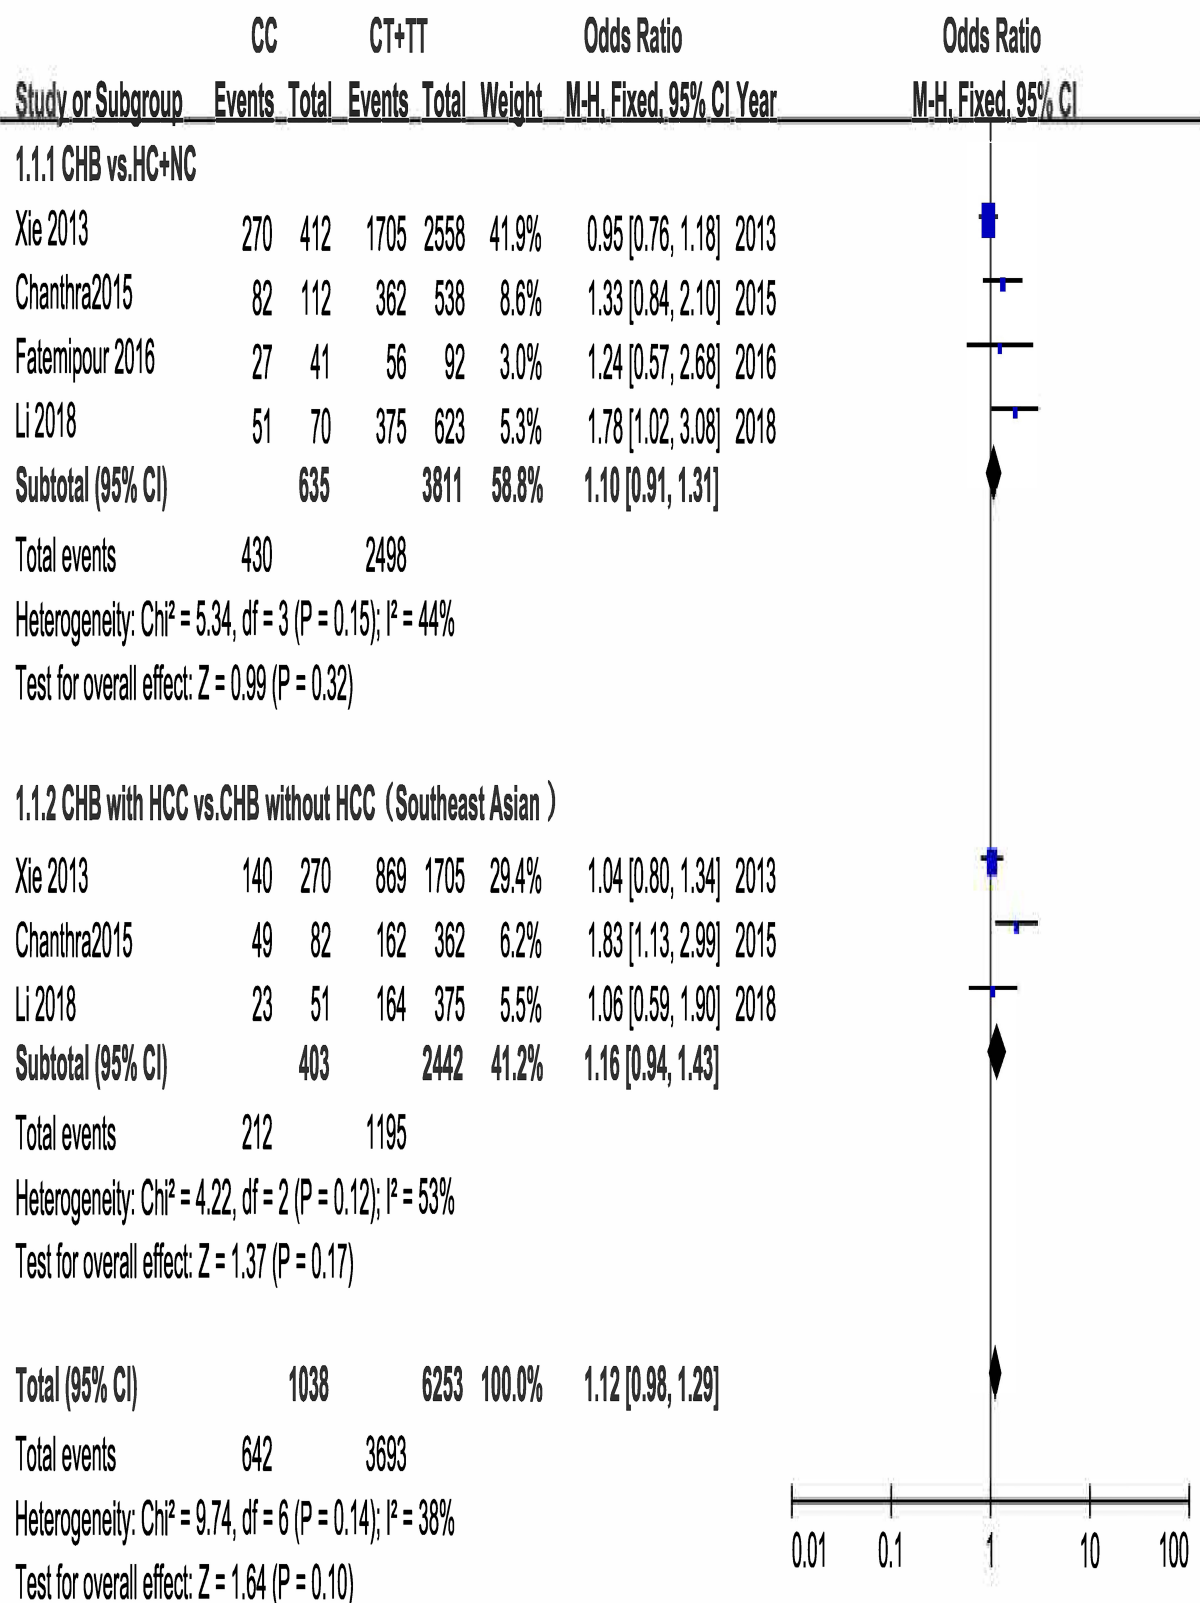

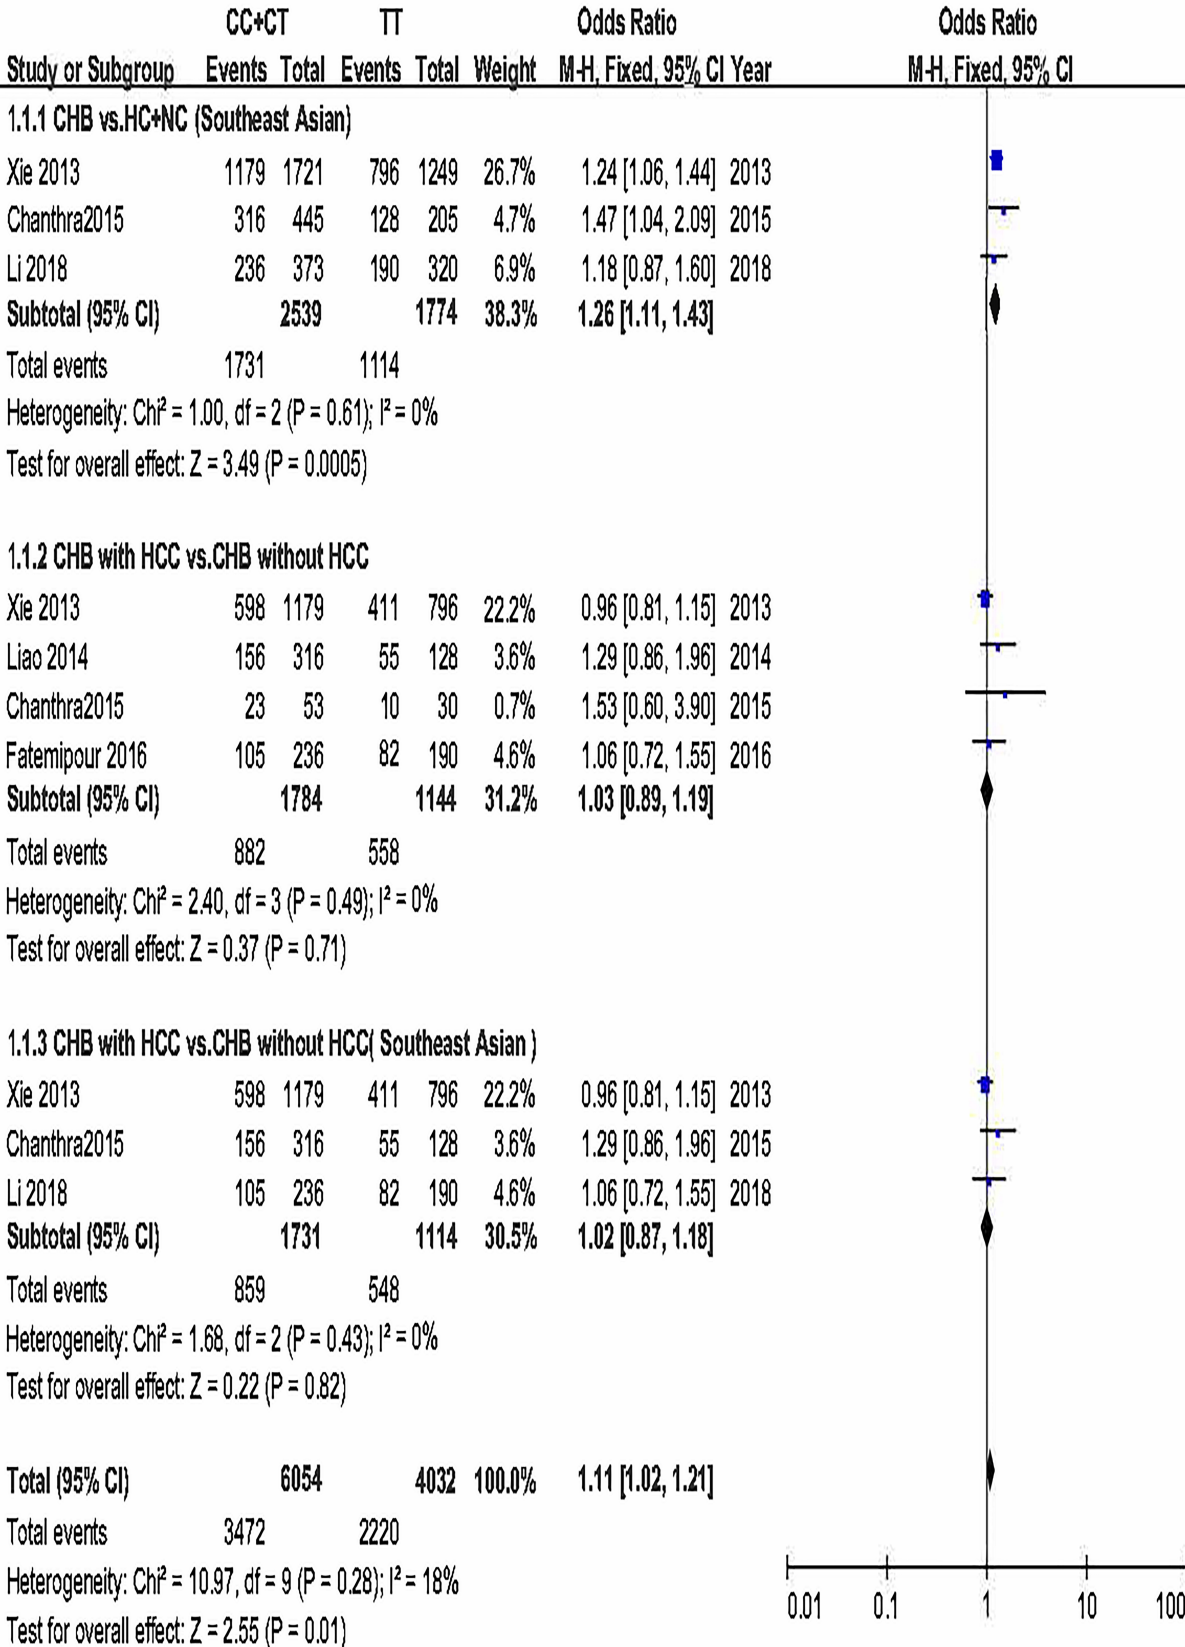

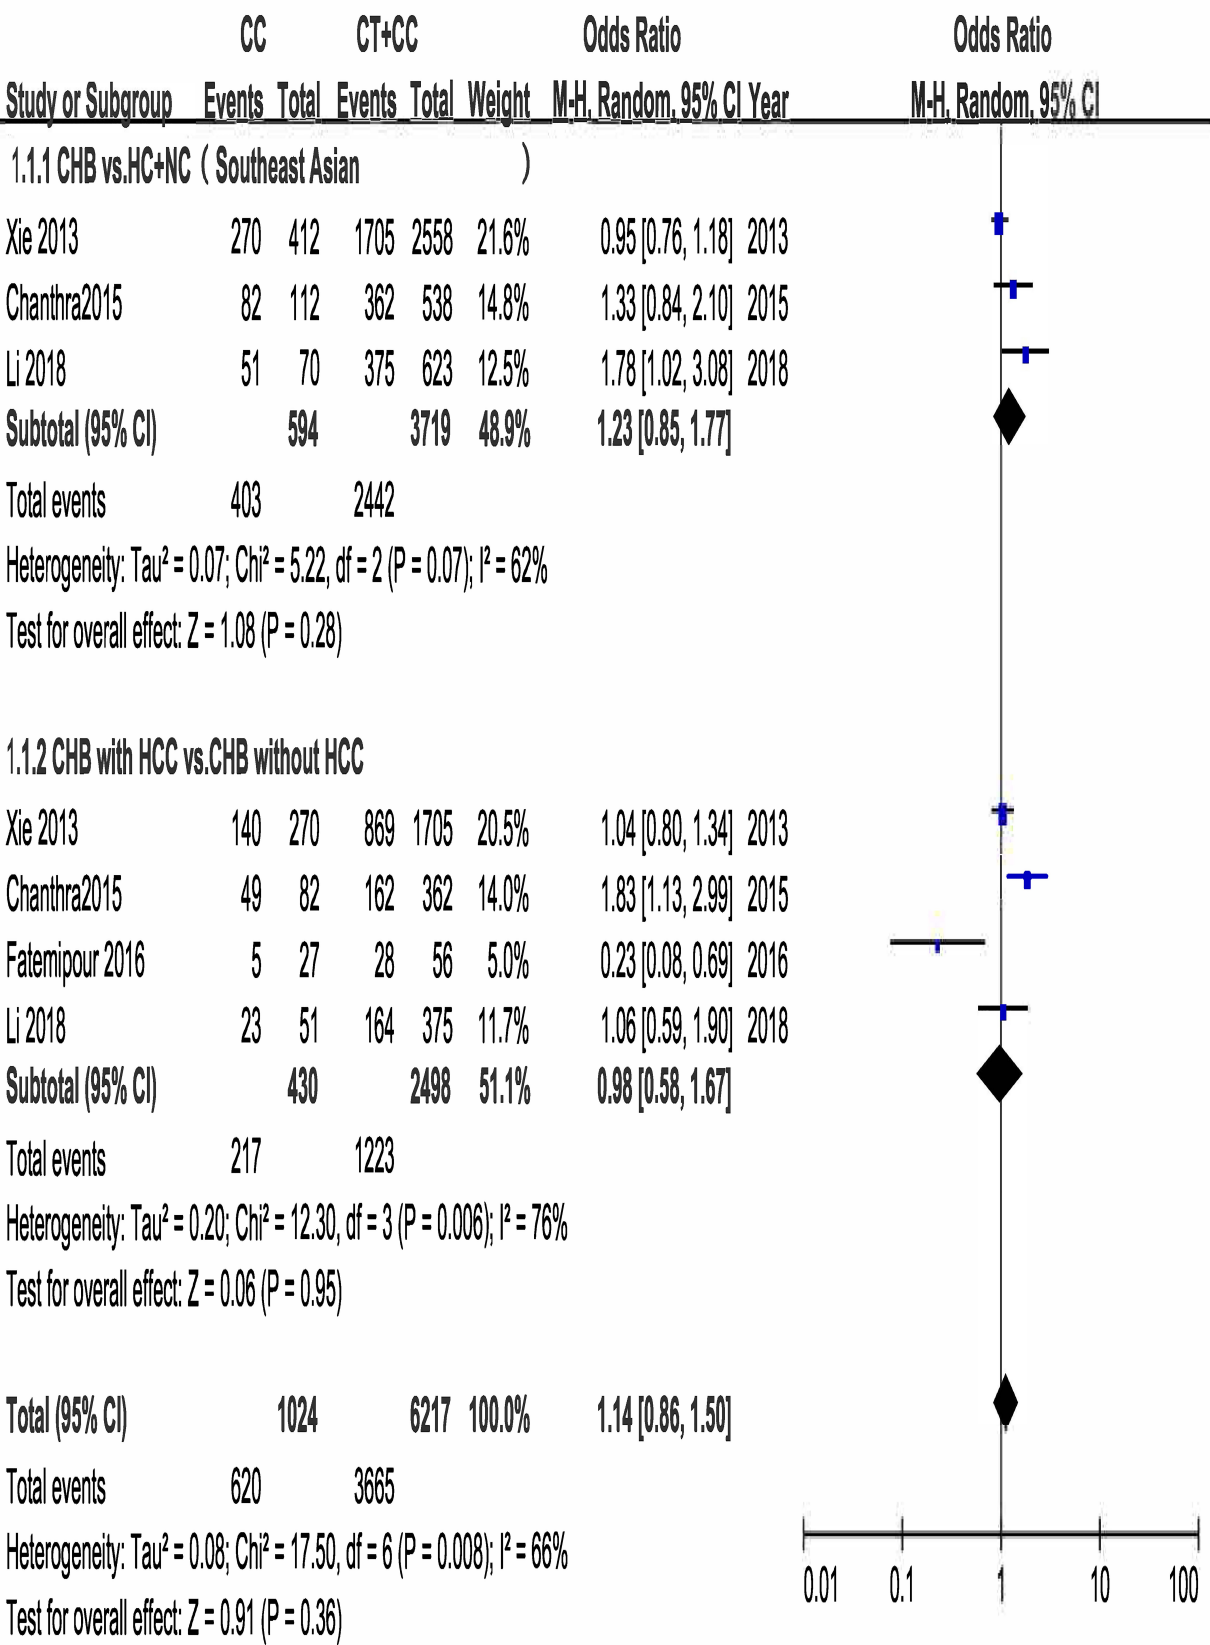



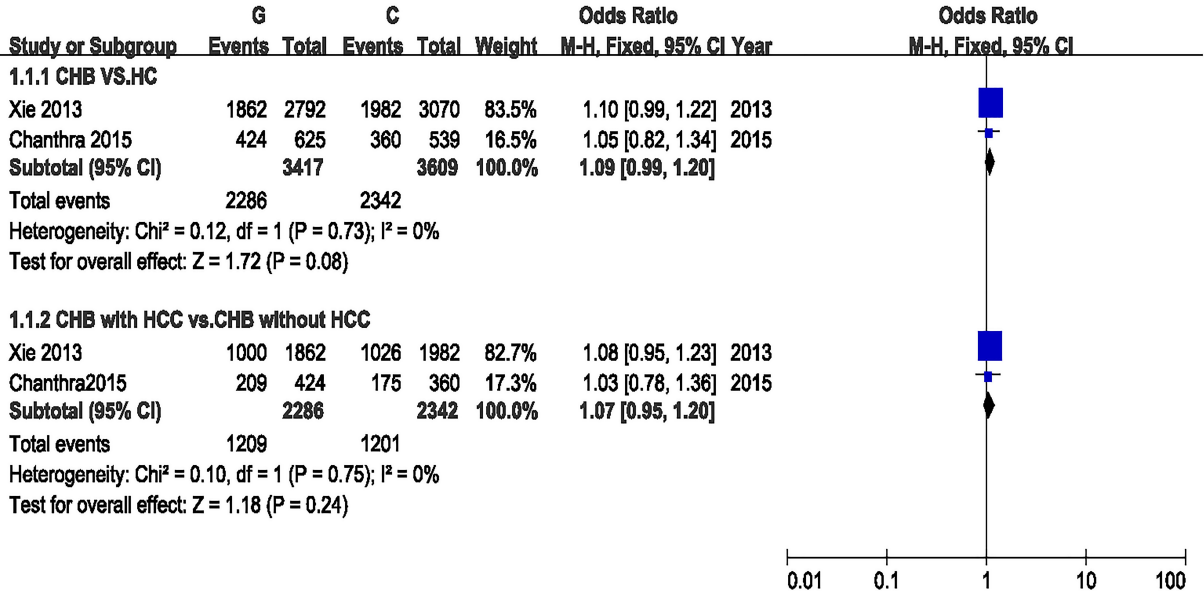

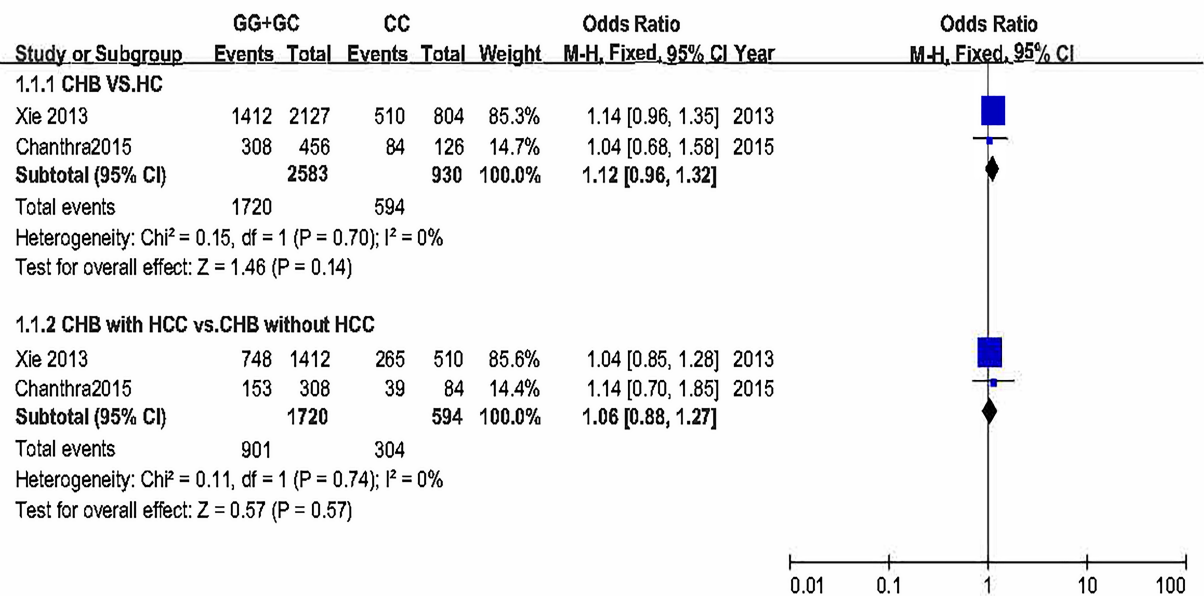

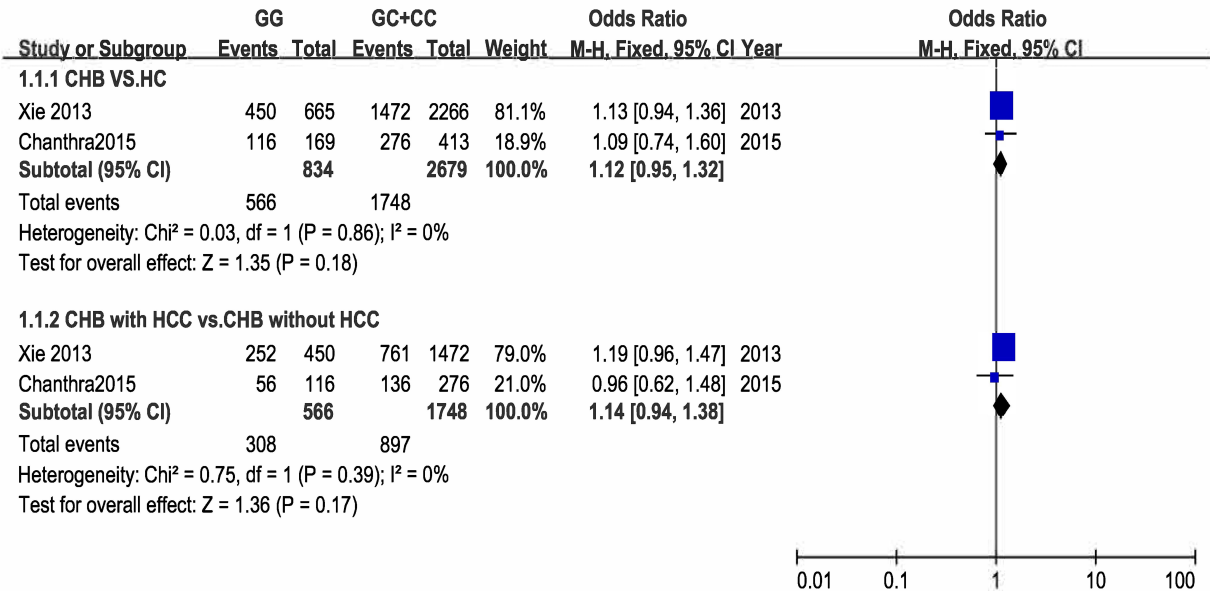

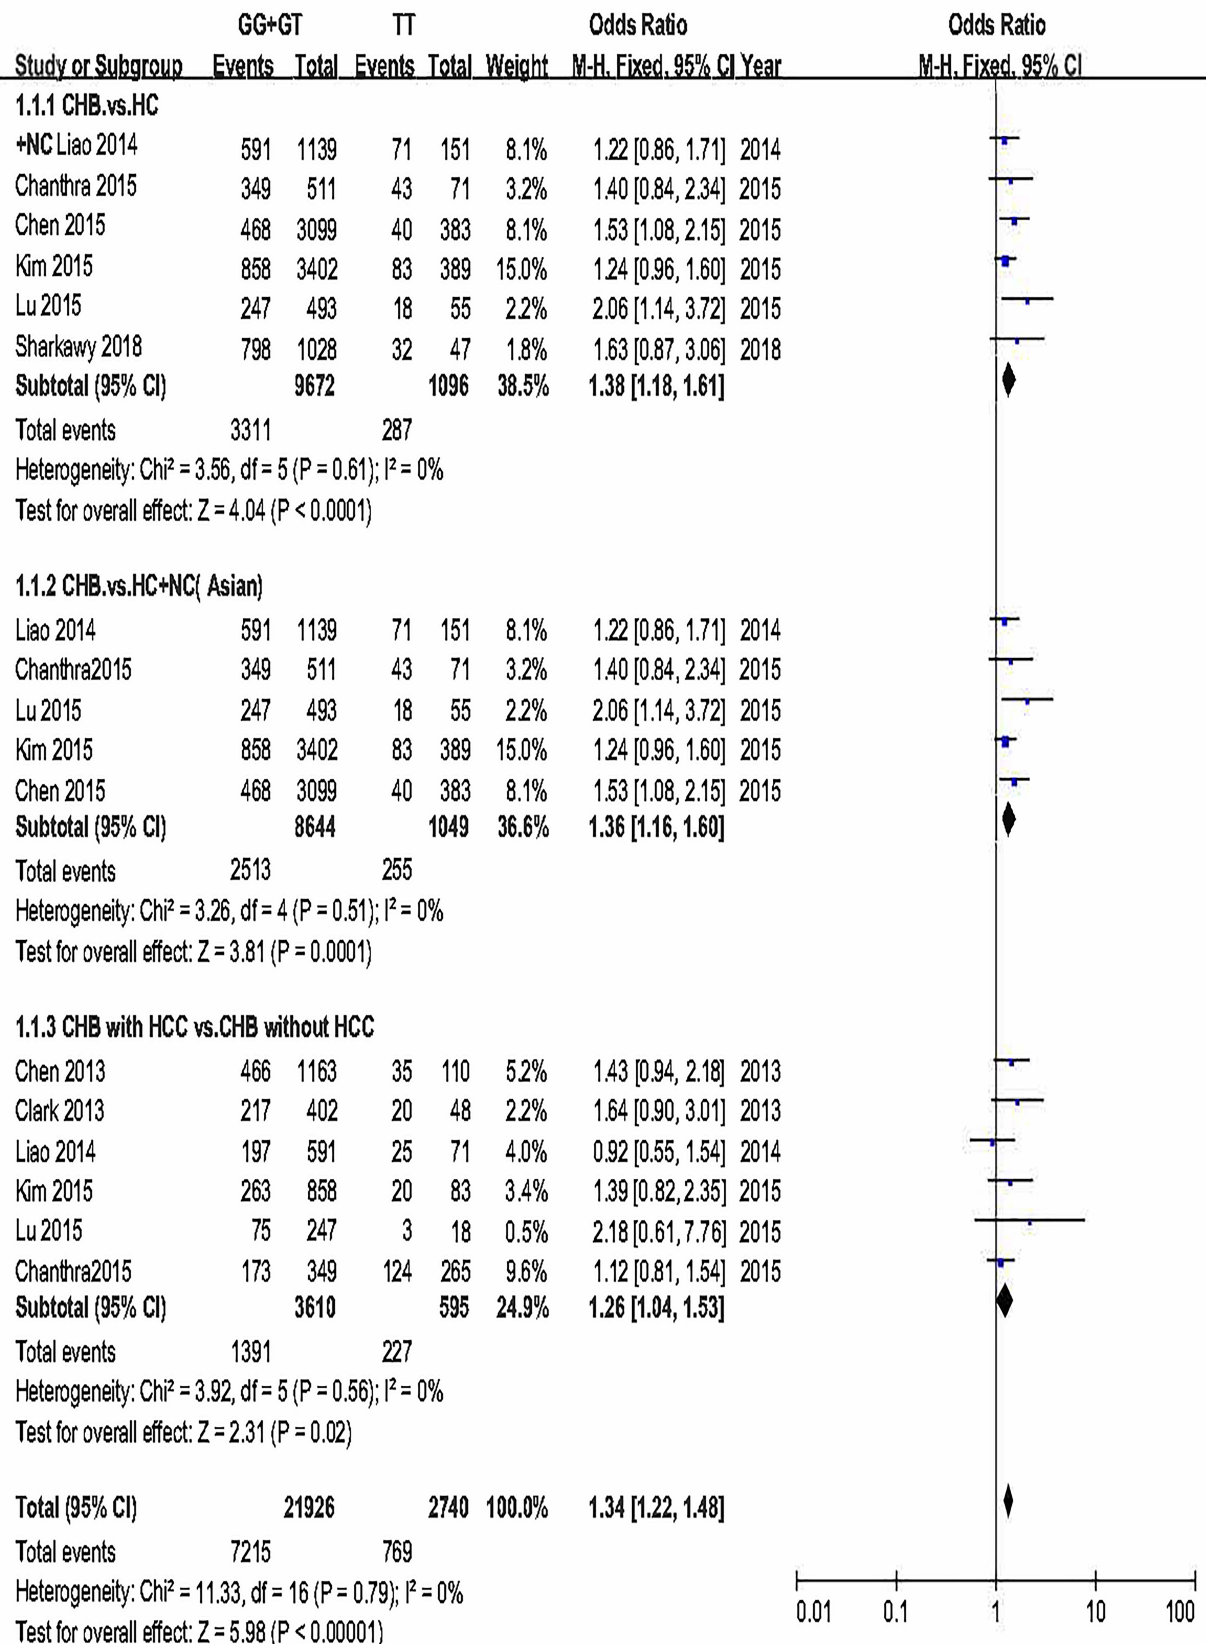

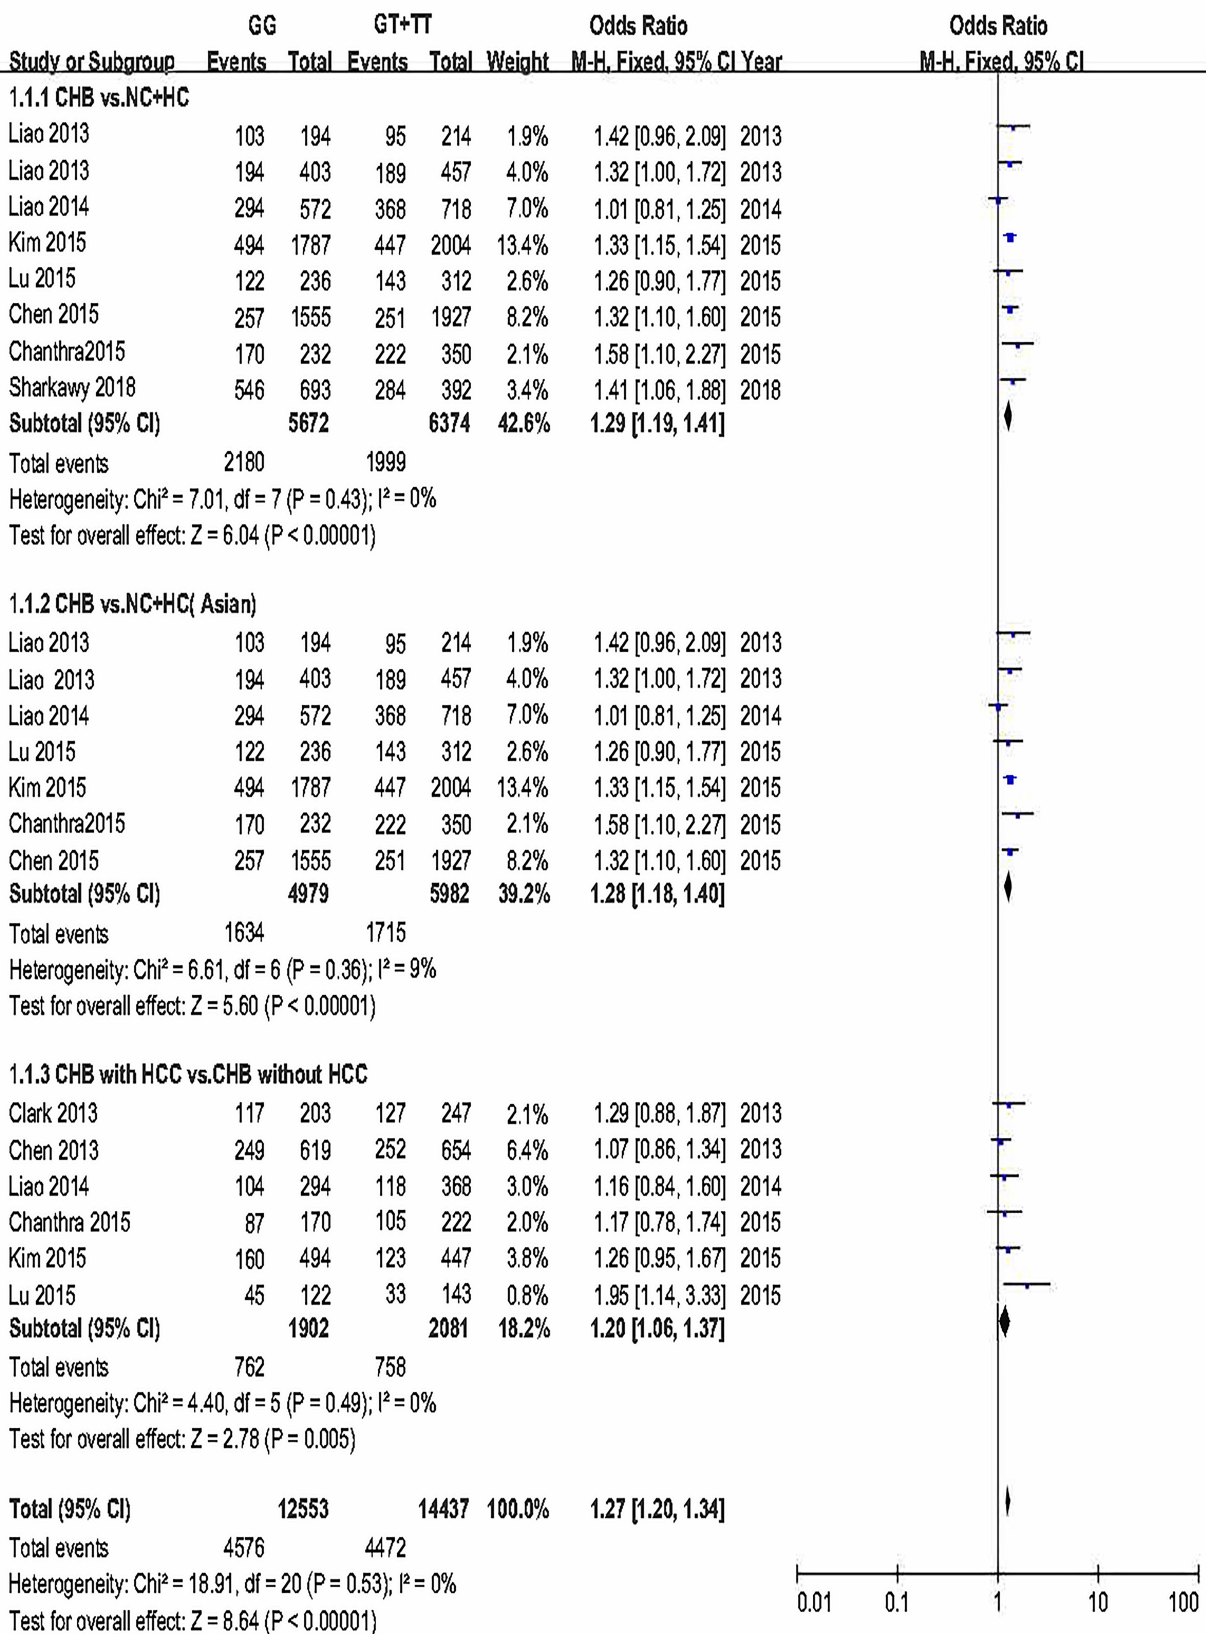

**Supplemental Table S. Score of quality assessment**

| Criteria                                          | Score |
|---------------------------------------------------|-------|
| Representativeness of case                        |       |
| Selected from population cancer registry          | 2     |
| Selected from hospital                            | 1     |
| No method of selection described                  | 0     |
| Representativeness of control                     |       |
| Population-based                                  | 3     |
| Blood donors                                      | 2     |
| Hospital-based                                    | 1     |
| Not described                                     | 0     |
| Ascertainment of NHL case                         |       |
| Histopathologic confirmation                      | 2     |
| by patient medical record                         | 1     |
| Not described                                     | 0     |
| Control selection                                 |       |
| Controls matched with cases by age and sex        | 2     |
| Controls matched with cases only by age or by sex | 1     |
| Not matched or not described                      | 0     |
| Genotyping examination                            |       |
| Genotyping done blindly and quality control       | 2     |
| Only genotyping done blindly or quality control   | 1     |
| Unblinded and without quality control             | 0     |
| HWE                                               |       |
| HWE in the control group                          | 1     |
| HWD in the control group or not mentioned         | 0     |
| Total sample size                                 |       |
| > 1000                                            | 3     |
| 501 - 1000                                        | 2     |
| 201 - 500                                         | 1     |
| ≤ 200                                             | 0     |
